# Supplementary material for: Organic dopant cyclization and significantly improved RTP properties
Source: Royal Society of Chemistry journal article supplement (doi:10.1039/d4sc06213b), 2024-01-01
Supplement: d4sc06213b1.pdf [file d4sc06213b1.pdf]

## Supporting Information

### **Organic Dopant Cyclization and Significantly Improved RTP Properties**

*Shiguo Zhang, Guanyu Liu, Zhichao Mao, Shanfeng Xue, Qikun Sun\*, Wenjun Yang\*.*

S. Zhang, G. Liu, Z. Z. Mao, S. Xue, Prof. Q. Sun, Prof. W. Yang  
Key Laboratory of Rubber-Plastics of the Ministry of Education, School of Polymer  
Science & Engineering, Qingdao University of Science and Technology, Qingdao  
266042, P. R. China.  
E-mail: ywjph2004@qust.edu.cn, qksun@qust.edu.cn

## Experimental Procedure

$^1\text{H}$  spectra were recorded on AC500 spectrometer (Bruker, Germany) at 500 MHz, respectively. The steady-state photoluminescence spectra were recorded on Hitachi F-4600 spectrophotometer. The ultraviolet absorption spectra were tested using a Hitachi model U-4100 ultraviolet spectrophotometer. Absolute PL quantum yields (PL efficiency) were determined with an integrating sphere spectrometer C11347 (Hamamatsu, Japan). Time-resolved spectra were recorded by an Edinburgh Instruments modular fluorescence lifetime spectrometer (FLS-1000). The lifetimes ( $\tau$ ) of the luminescence were obtained by fitting the decay curve with a multi-exponential decay function of

$$R(t) = \sum_i B_i e^{-\frac{t}{\tau_i}} \quad (\text{S1})$$

where  $B_i$  and  $\tau_i$  represent the amplitudes and lifetimes of the individual components for multi-exponential decay profiles, respectively. The digital photographs were captured by the FDR-AX700 4K HDR digital cameras (SONY, Japan). The low temperature photoluminescence spectra were performed on a QE Pro spectrometer with a CCD array (Ocean Optics) as a power detector.

The Gaussian 09 program was utilized to perform the TD-DFT calculations. The exciton energies of the  $n$ -th singlet ( $S_n$ ) and  $n$ -th triplet states ( $T_n$ ) were obtained on the corresponding ground state structure using TD-B3LYP/6-31G\*. The Kohn–Sham frontier orbital analysis and spin density distributions were obtained to elucidate the mechanisms of possible singlet–triplet intersystem crossings (ISC).

## Materials

Polymethyl methacrylate (PMMA, CM-211, molecular weight: 80000-200000) and acrylonitrile butadiene styrene (ABS, PA-709) were obtained from Chi Mei Co., Ltd (Taiwan, China). All other chemicals and solvents were purchased from Energy Chemical Co., Ltd (Shanghai, China) and used with further purification.

## Dopant molecular synthesis

### 8,8-diphenyl-8H-indolo[3,2,1-de]acridine (DIA)

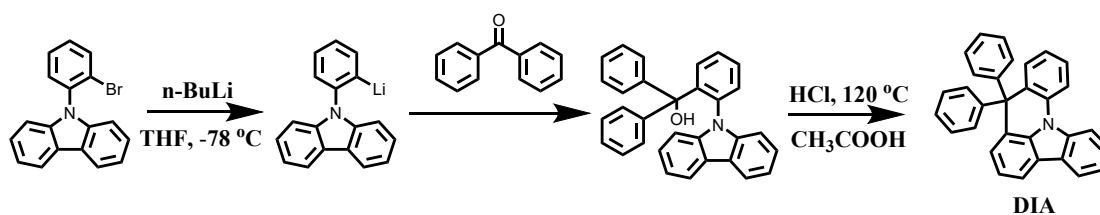

In a 100 mL bottom flask, 9-(2-Bromophenyl)-9H-carbazole (2.1 g, 6.6 mmol) were dissolved in tetrahydrofuran (THF) (20 mL) in a nitrogen environment. Cool the mixture to -78 °C and slowly add *n*-BuLi (3.4 mL). The mixture was stirred at -78 °C for 2 h. Dissolving benzophenone (1.5 g, 8.5 mmol) in THF (10 mL) under nitrogen conditions. The mixture was stirred for another 30 minutes at -78 °C and allowed warming up to room temperature gradually and then add saturated NaHCO<sub>3</sub>. The mixture was poured into water and extracted with dichloromethane, the combined organic layer was dried with anhydrous MgSO<sub>4</sub>, filtered and concentrated in vacuo. The crude product was purified by silica gel column chromatography using petroleum ether/dichloromethane (2:1, v/v) as the eluent, yielding a white solid (2.02 g, yield 56%). Dissolve the obtained powder in acetic acid (20ml) and add a catalytic amount of HCl) aqueous solution (5 mol% 12N). Reflux at 120 °C for 12 h. The mixture was poured into water and extracted with dichloromethane, the combined organic layer was dried with anhydrous MgSO<sub>4</sub>, filtered and concentrated in vacuo. The crude product was purified by silica gel column chromatography using petroleum ether/dichloromethane (3:1, v/v) as the eluent, yielding a white solid (1.12 g, yield 52%).<sup>1</sup>H NMR (500 MHz, DMSO-*d*<sub>6</sub>) δ 8.32 – 8.27 (m, 2H), 8.23 (dd, *J* = 8.3, 1.2 Hz, 1H), 8.11 (dd, *J* = 7.7, 1.0 Hz, 1H), 7.60 (ddd, *J* = 8.4, 7.2, 1.3 Hz, 1H), 7.47 (ddd, *J* = 8.4, 7.3, 1.6 Hz, 1H), 7.40 (td, *J* = 7.7, 1.4 Hz, 2H), 7.33 – 7.27 (m, 4H), 7.27 – 7.22 (m, 2H), 7.18 (td, *J* = 7.6, 1.1 Hz, 1H), 7.01 – 6.95 (m, 6H). <sup>13</sup>C NMR (126 MHz, DMSO) δ 146.29, 138.23, 136.98, 136.50, 131.94, 130.06, 128.62, 128.48, 127.97, 127.44, 127.18, 126.40, 126.35, 123.64, 123.10, 122.11, 121.93, 119.06, 115.05, 114.12, 56.94, 40.58, 40.49, 40.42, 40.32, 40.25, 40.16, 40.08, 39.99, 39.83, 39.66, 39.49.

### Spiro[fluorene-9,8'-indolo[3,2,1-de]acridine] (CDIA)

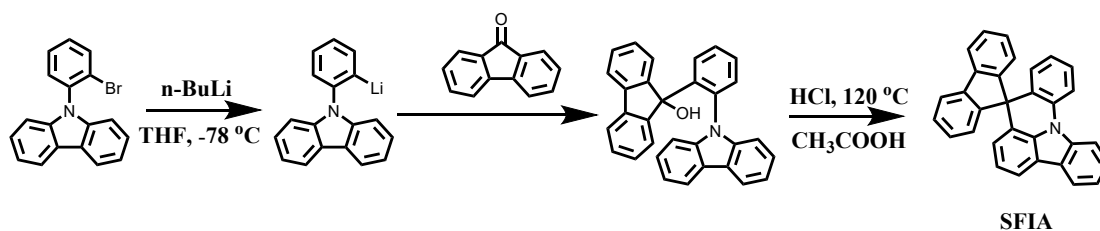

The synthesis steps are the same as DIA, only replacing benzophenone with 9 fluorenone. The crude product was purified by silica gel column chromatography using petroleum ether/dichloromethane (3:1, v/v), yielding a white solid (2.24 g, yield 58%). <sup>1</sup>H NMR (500 MHz, Chloroform-*d*) δ 8.30 (d, *J* = 8.3 Hz, 1H), 8.24 (d, *J* = 8.3 Hz, 1H), 8.20 (d, *J* = 7.7 Hz, 1H), 7.86 (dd, *J* = 18.3, 7.6 Hz, 3H), 7.64 (ddd, *J* = 8.5, 7.2, 1.4 Hz, 1H), 7.45 – 7.30 (m, 4H), 7.21 – 7.11 (m, 4H), 7.08 (t, *J* = 7.6 Hz, 1H), 6.85 (t, *J* = 7.5 Hz, 1H), 6.63 (dd, *J* = 7.8, 1.6 Hz, 1H), 6.53 (d, *J* = 7.5 Hz, 1H), 5.36 – 5.24 (m, 12H). <sup>13</sup>C NMR (126 MHz, DMSO) δ 155.41, 139.46, 136.77, 136.35, 129.07, 129.04, 129.01, 128.89, 128.54, 127.64, 125.94, 125.62, 124.54, 123.98, 123.15, 123.09, 122.61, 121.86, 121.76, 121.01, 118.91, 115.24, 114.49, 56.70, 40.50, 40.42, 40.33, 40.25, 40.16, 40.00, 39.92, 39.83, 39.66, 39.50. MS: *m/z* Calcd for C<sub>31</sub>H<sub>19</sub>N: 405.1517; found 405.1513 [M]<sup>+</sup>.

#### Spiro[indolo[3,2,1-de]acridine-8,9'-xanthene] (ODIA)

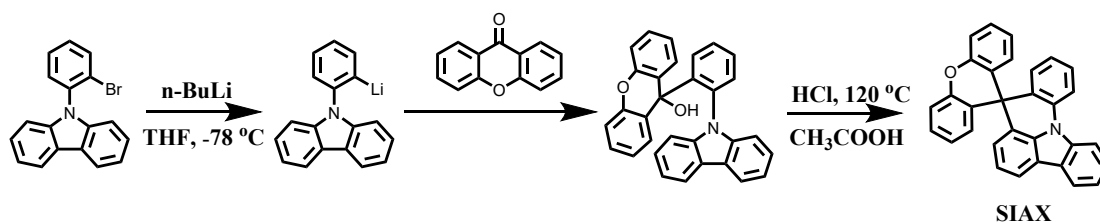

The synthesis steps are the same as DIA, only replacing benzophenone with xanthone. The crude product was purified by silica gel column chromatography using petroleum ether/dichloromethane (3:1, v/v), yielding a white solid (1.85 g, yield 53%). <sup>1</sup>H NMR (500 MHz, DMSO-*d*<sub>6</sub>) δ 8.47 (d, *J* = 8.5 Hz, 1H), 8.34 (ddd, *J* = 12.6, 8.1, 1.2 Hz, 2H), 8.02 (dd, *J* = 7.7, 1.0 Hz, 1H), 7.68 – 7.64 (m, 1H), 7.45 – 7.38 (m, 2H), 7.28 – 7.19 (m, 5H), 7.06 – 7.02 (m, 1H), 6.97 (dd, *J* = 7.9, 1.7 Hz, 1H), 6.89 (ddd, *J* = 8.2, 6.9, 1.5 Hz, 2H), 6.80 (dd, *J* = 7.5, 1.0 Hz, 1H), 6.75 (dd, *J* = 7.9, 1.5 Hz, 2H). <sup>13</sup>C NMR (126 MHz, DMSO) δ 148.44, 138.19, 135.17, 133.93, 133.58, 131.67, 130.19, 128.79, 128.72, 127.82, 126.66, 125.78, 124.44, 124.30, 123.54, 122.07, 121.92, 121.75,

118.70, 116.57, 114.76, 114.24, 44.88, 40.60, 40.50, 40.43, 40.34, 40.26, 40.17, 40.09, 40.00, 39.93, 39.84, 39.67, 39.50. MS:  $m/z$  Calcd for  $C_{31}H_{19}NO$ : 421.1467; found 421.1459  $[M]^+$ .

## Preparation of organic doped polymers

DIA, CDIA and ODIA were dissolved into PMMA/ABS solution in dichloromethane by 0.1% weight ratio vs polymer and evaporated into film. The film is taken out and further dried in oven at 80-100 °C for 12 h. Then, film was thermoplasticized on an open two-roll mill ca. 2 min at 145 °C for PMMA/ABS. The thermoplasticized film was molded into 3 cm × 3 cm × 1 mm plate on a flat vulcanizer under 5 MPa for 3 min at 190 °C for PMMA/ABS. After cooling under 2 MPa at room temperature. A smoothing sheet was obtained after cold pressing.

## Figures and Tables

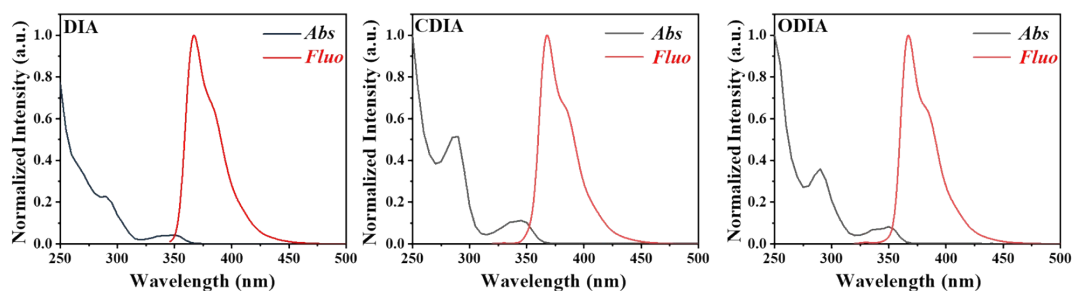

**Figure S1.** The ultraviolet-visible absorption spectra (Abs.), fluorescent spectra (Fluo.) in dilute tetrahydrofuran (THF) solution.

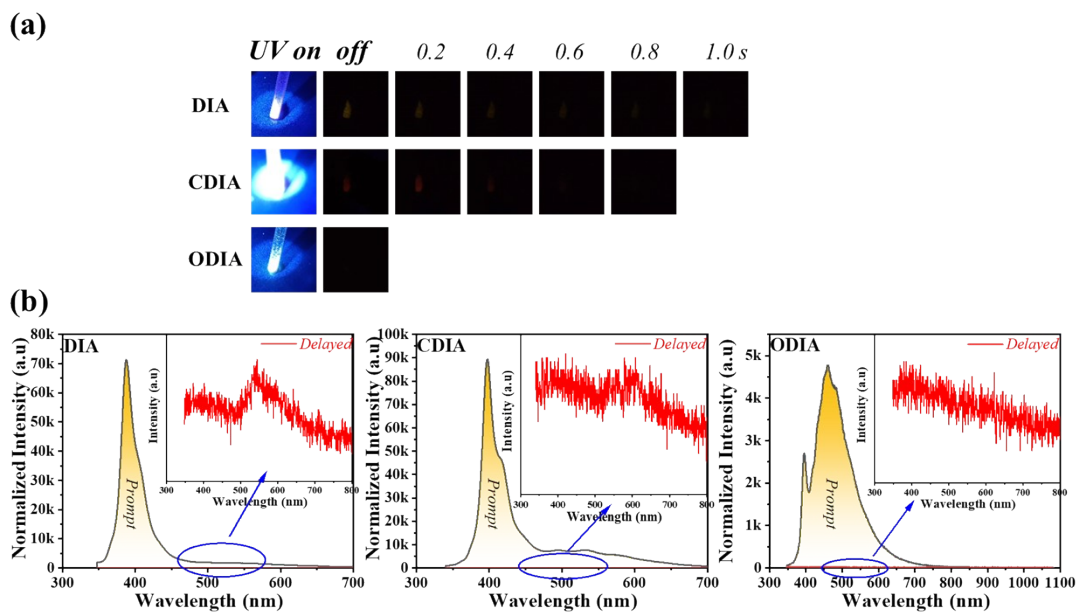

**Figure S2.** (a) The room temperature PL photographs of DIA, SFIA and SIAX powder. (b) The room temperature prompt and delayed PL spectra of DIA, CDIA and ODIA powder under 310 nm light excitation.

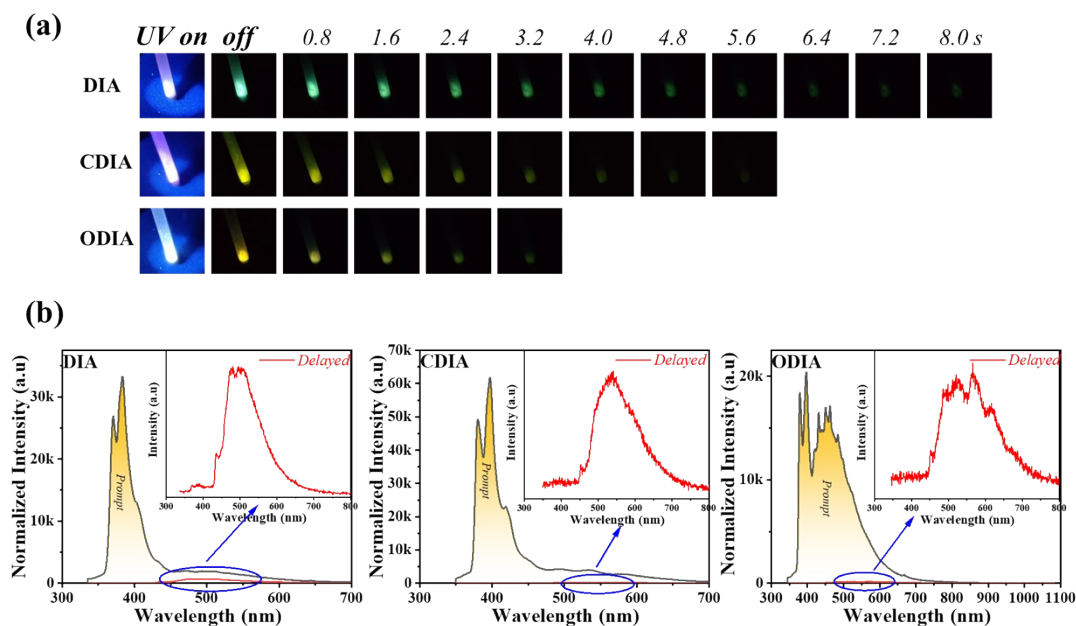

**Figure S3.** (a) The low temperature PL photographs of DIA, SFIA and SIAX powder. (b) The low temperature prompt and delayed PL spectra of DIA, CDIA and ODIA powder under 310 nm light excitation.

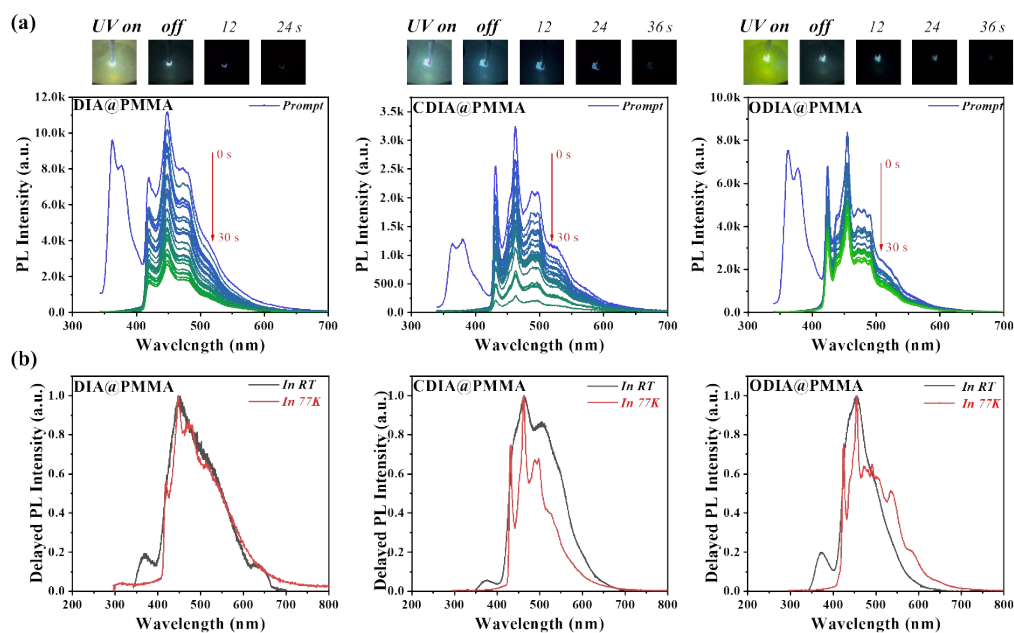

**Figure S4.** (a) Low temperature photos and prompt spectra of DIA@PMMA, SFIA@PMMA and SIAX@PMMA, as well as delayed decay spectra from 0 to 30 s. (b) Comparison of delayed spectra of DIA@PMMA, CDIA@PMMA and ODIA@PMMA under room temperature and low temperature conditions.

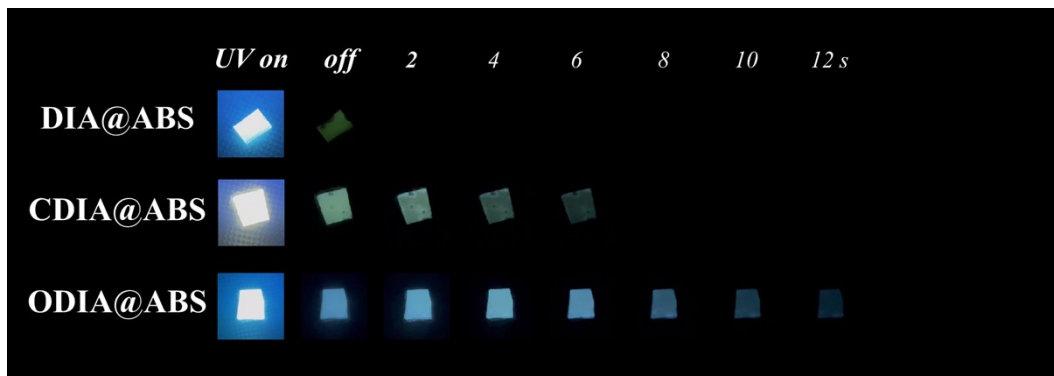

**Figure S5.** The room temperature PL photographs of DIA, CDIA and ODIA (0.1%) in ABS after removing 365 nm UV light ( $3 \text{ mW/cm}^2$ ).

pdata/1  
PROTON DMSO [E:\data\test2023] test 15

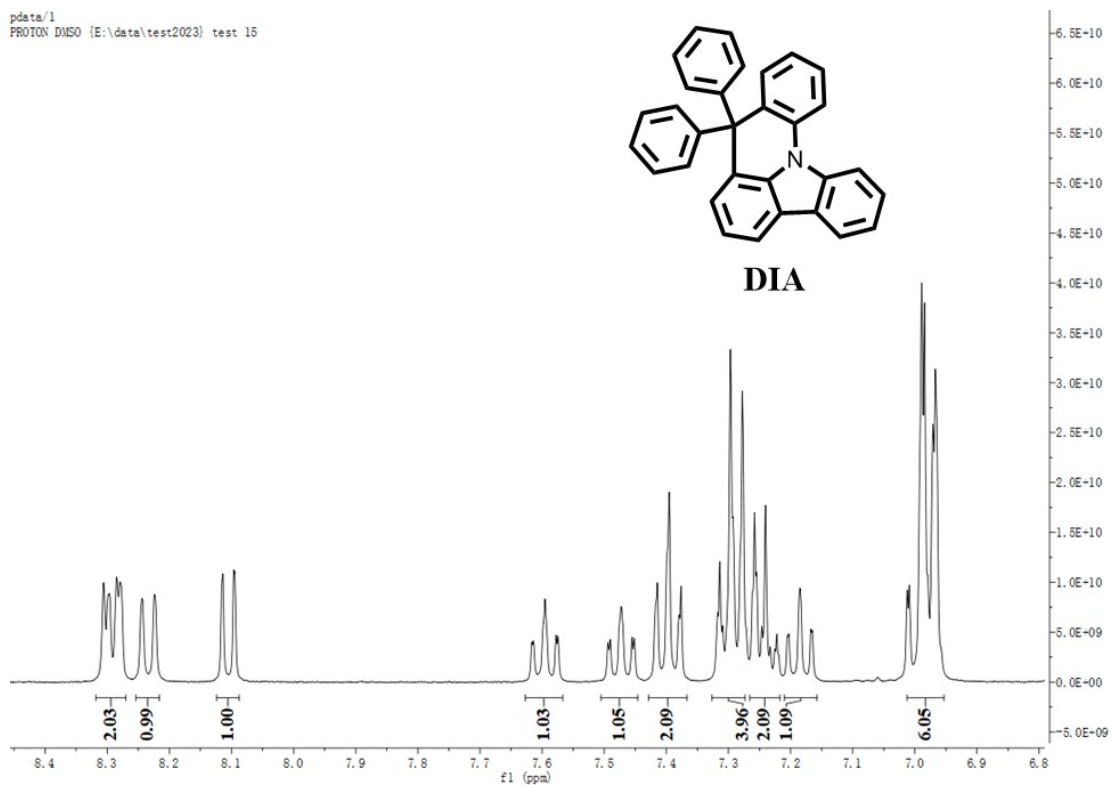

**Figure S6.**  $^1\text{H}$  spectrum of DIA in  $\text{DMSO-}d_6$ .

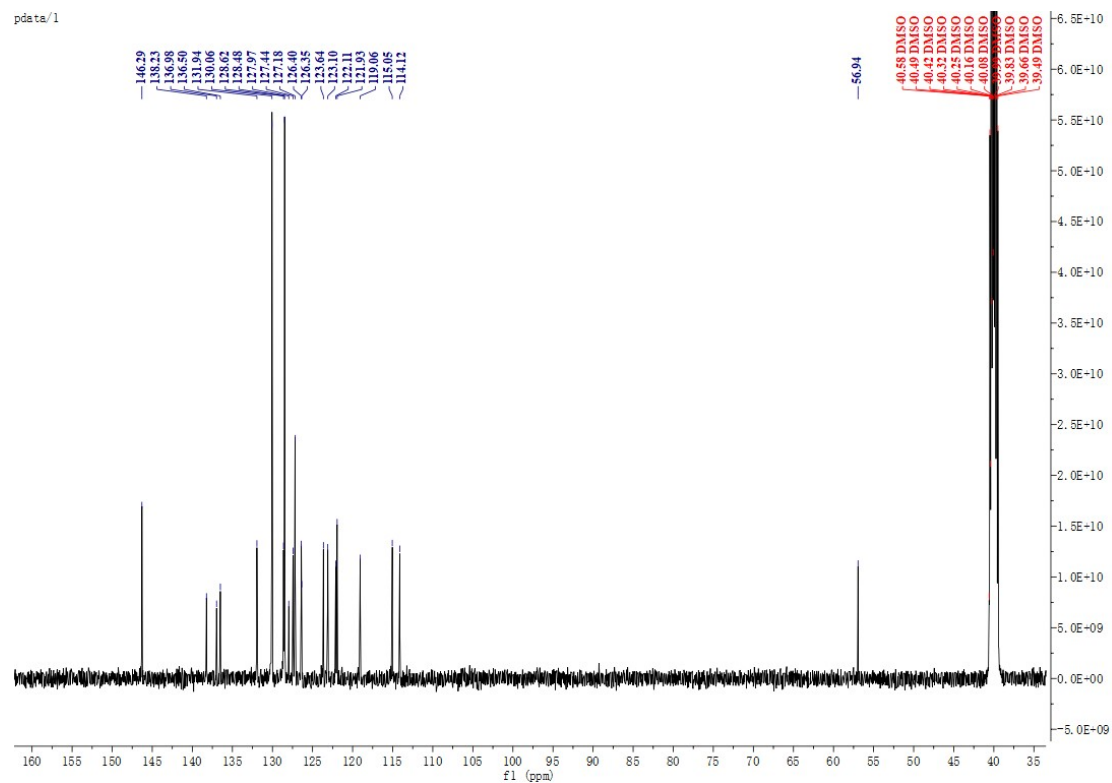

**Figure S7.**  $^{13}\text{C}$  spectrum of DIA in  $\text{DMSO-}d_6$ .



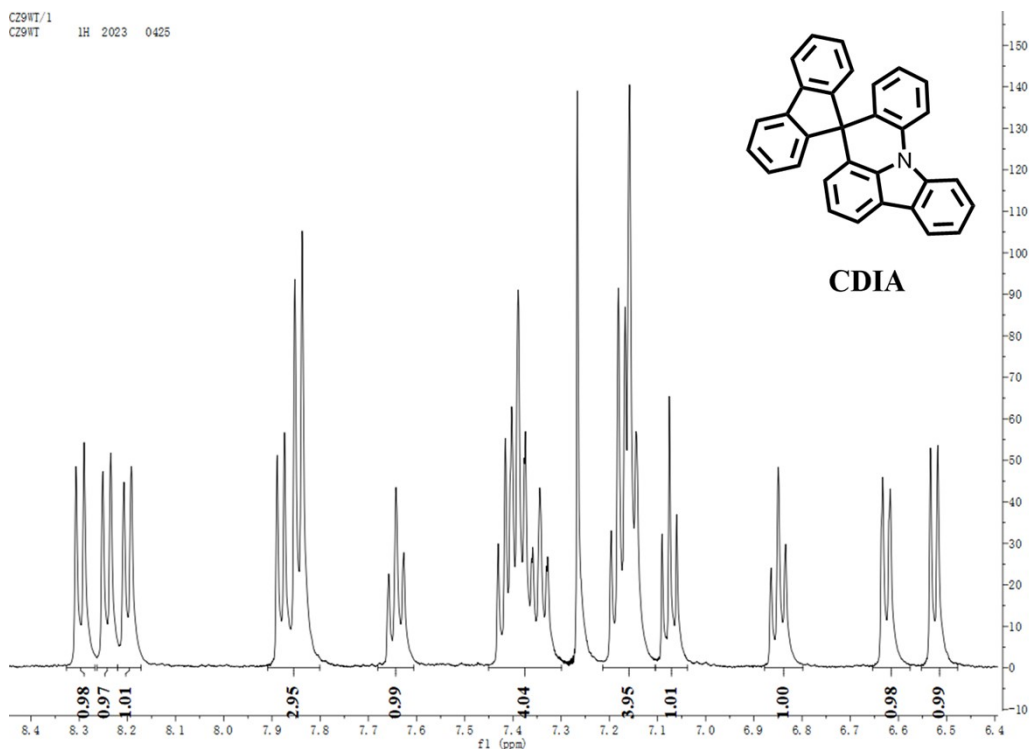

**Figure S8.**  $^1\text{H}$  spectrum of CDIA in Chloroform- $d$ .

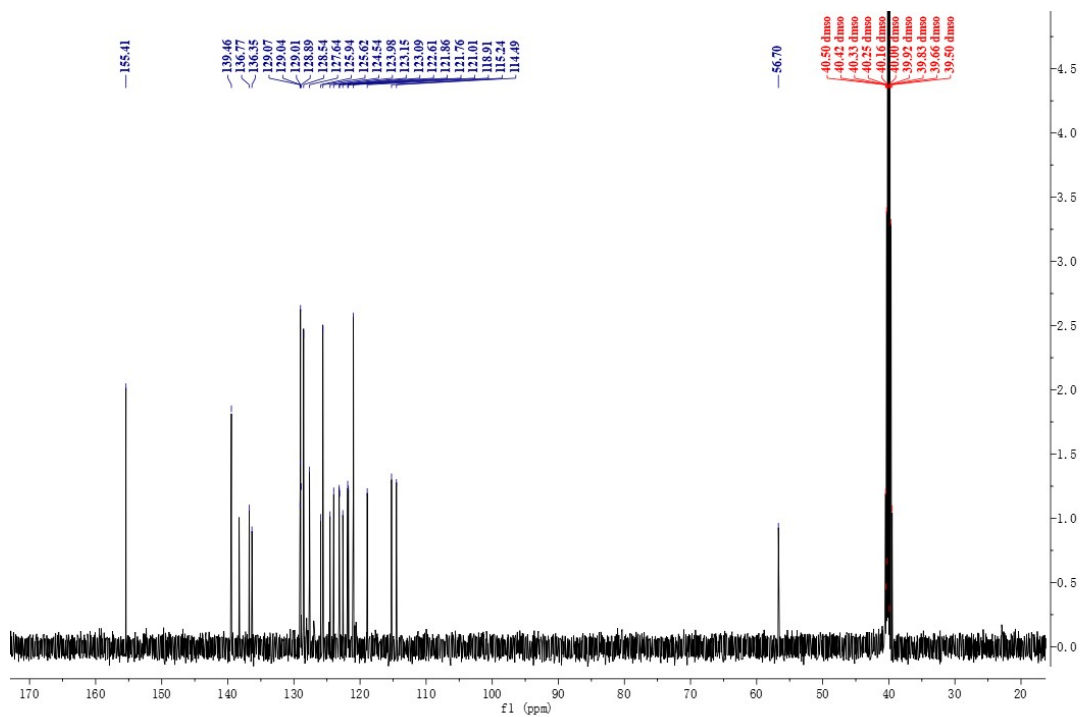

**Figure S9.**  $^{13}\text{C}$  spectrum of CDIA in DMSO- $d_6$ .

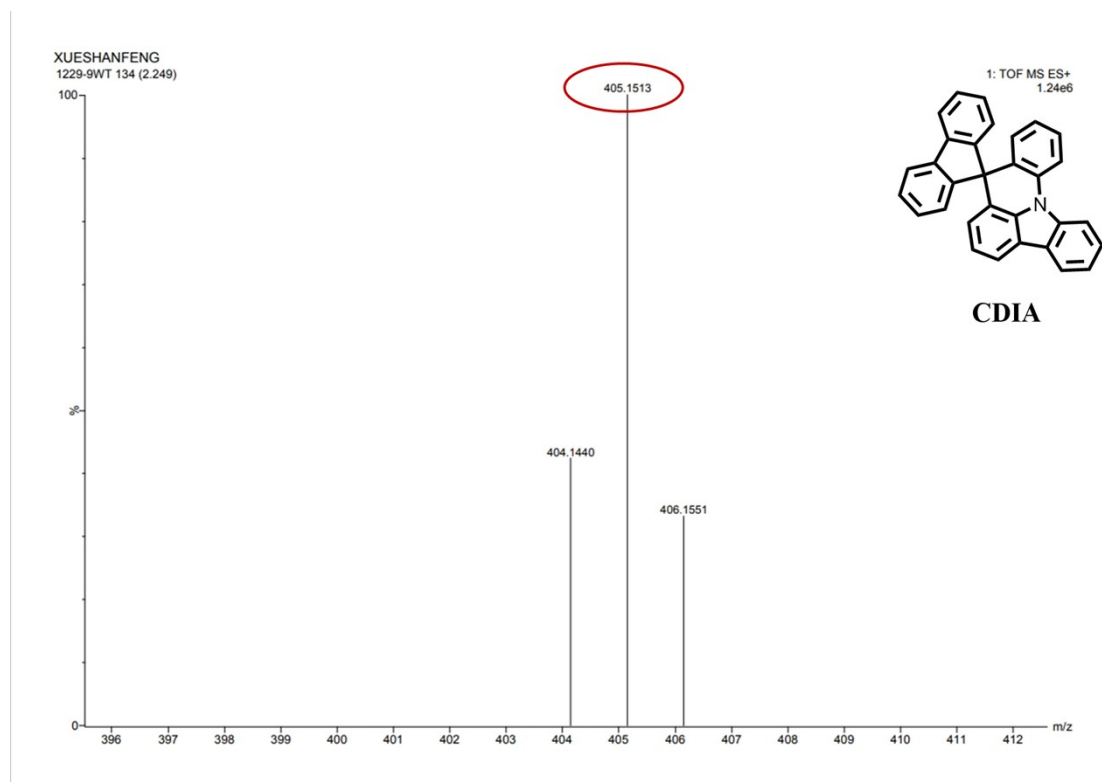

**Figure S10.** HR Mass Spectrum ( $M^+$ ) of CDIA.

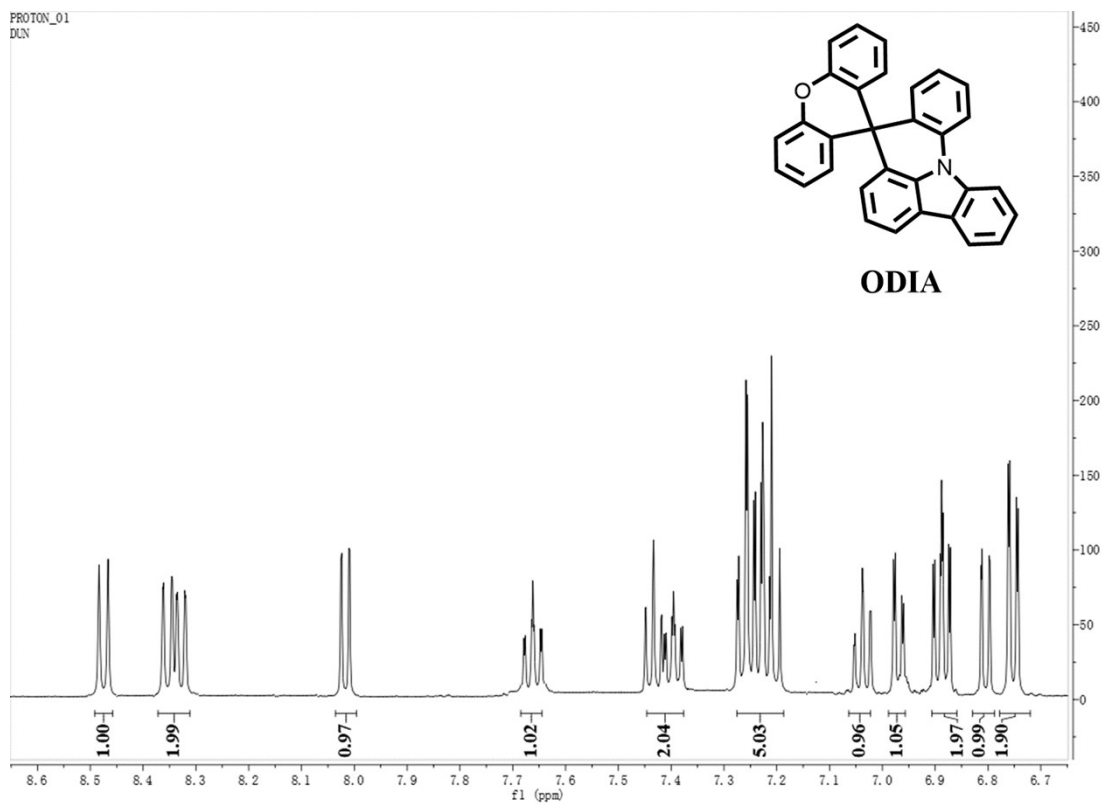

**Figure S11.**  $^1\text{H}$  spectrum of ODIA in  $\text{DMSO-}d_6$ .

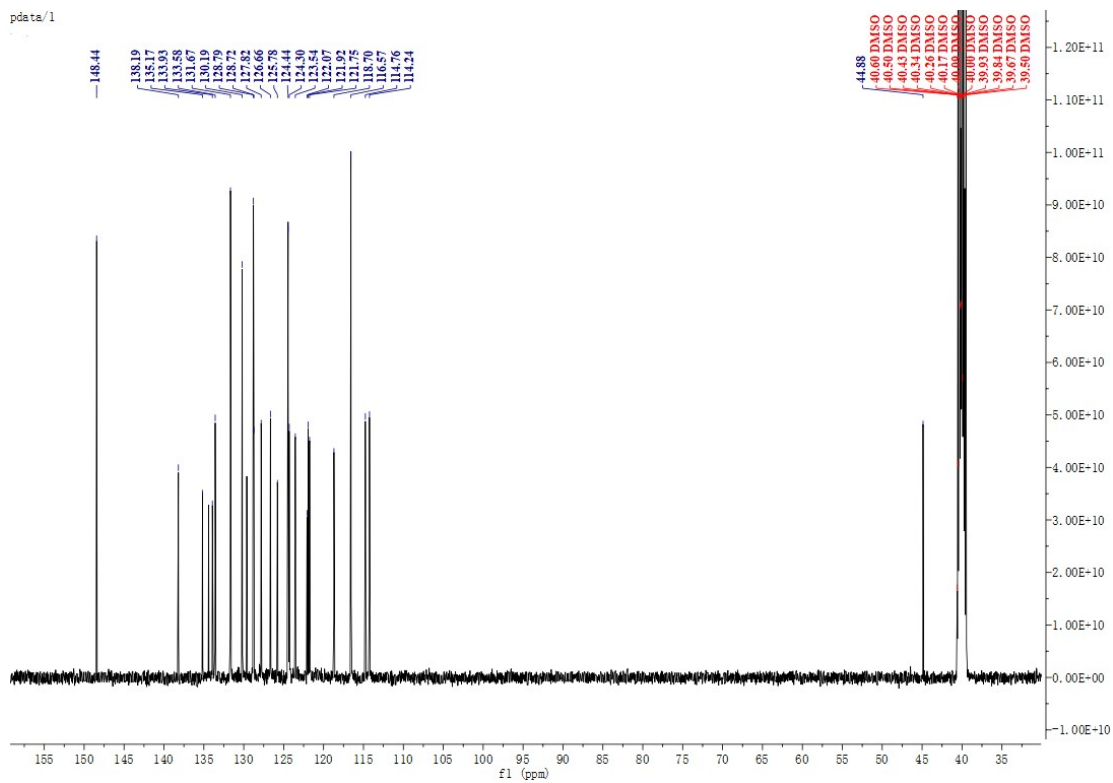

**Figure S12.**  $^{13}\text{C}$  spectrum of ODIA in  $\text{DMSO-}d_6$ .

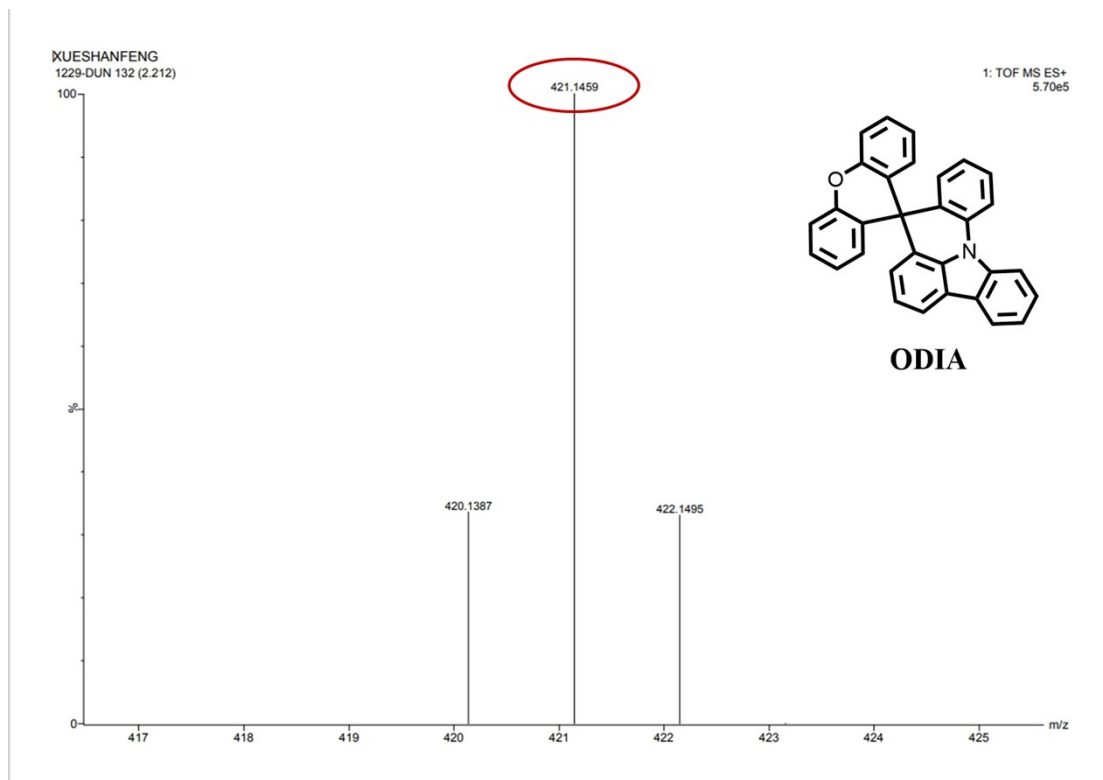

**Figure S13.** HR Mass Spectrum ( $\text{M}^+$ ) of ODIA.

**Table S1.** Phosphorescence lifetimes of **DIA@PMMA**, **CDIA@PMMA** and **ODIA@PMMA** films.

| Film             | Component | $\tau_1$ | $A_1$ | $\tau_2$ | $A_2$ | $\tau_3$ | $A_3$ | $\tau_P$ |
|------------------|-----------|----------|-------|----------|-------|----------|-------|----------|
|                  |           | (ms)     | (%)   | (ms)     | (%)   | (ms)     | (%)   | (ms)     |
| <b>DIA@PMMA</b>  | 449 nm    | 36.29    | 63.92 | 148.2    | 36.08 | /        | /     | 77       |
| <b>CDIA@PMMA</b> | 553 nm    | 75.49    | 4.59  | 568.9    | 26.96 | 2146     | 68.45 | 1619     |
| <b>ODIA@PMMA</b> | 454 nm    | 96.52    | 2.97  | 703.5    | 22.89 | 2656     | 74.14 | 2133     |

**Table S2.** Phosphorescence lifetimes of **CDIA/PR@PMMA** and **ODIA/PR@PMMA** films.

| Film           | Component | $\tau_1$ | $A_1$ | $\tau_2$ | $A_2$ | $\tau_3$ | $A_3$ | $\tau_P$ |
|----------------|-----------|----------|-------|----------|-------|----------|-------|----------|
|                |           | (ms)     | (%)   | (ms)     | (%)   | (ms)     | (%)   | (ms)     |
| <b>CDIA/PR</b> | 629 nm    | 32.39    | 15.90 | 302.5    | 36.61 | 1567     | 47.49 | 860      |
| <b>ODIA/PR</b> | 629 nm    | 27.95    | 9.76  | 334.9    | 25.37 | 1800     | 64.87 | 1255     |

**Table S3.** Crystal data for **CDIA** and **ODIA**.

| Compound         | <b>CDIA</b>        | <b>ODIA</b>      |
|------------------|--------------------|------------------|
| Chemical formula | $C_{124}H_{76}N_4$ | $C_{31}H_{19}NO$ |
| Formula weight   | 1621.88            | 421.47           |
| Crystal system   | triclinic          | monoclinic       |
| $a/\text{\AA}$   | 11.5151(5)         | 9.0420(2)        |
| $b/\text{\AA}$   | 13.9307(6)         | 25.7448(7)       |
| $c/\text{\AA}$   | 14.1697(6)         | 9.2981(2)        |

|                                  |                        |                        |
|----------------------------------|------------------------|------------------------|
| $\alpha/^\circ$                  | 91.208(2)              | 90                     |
| $\beta/^\circ$                   | 113.8220(10)           | 102.736(2)             |
| $\gamma/^\circ$                  | 93.799(2)              | 90                     |
| Unit cell volume/ $\text{\AA}^3$ | 2071.94(15)            | 2111.20(9)             |
| Temperature/K                    | 298(2)                 | 299.0                  |
| Space group                      | P 1                    | P -2yc                 |
| Z                                | 1                      | 4                      |
| F(000)                           | 848                    | 880                    |
| Theta range for data collection  | 2.33 to 27.96          | 3.433 to 68.716        |
| Index ranges                     | -13 $\leq$ h $\leq$ 13 | -10 $\leq$ h $\leq$ 10 |
|                                  | -16 $\leq$ k $\leq$ 16 | -26 $\leq$ k $\leq$ 31 |
|                                  | -16 $\leq$ l $\leq$ 16 | -8 $\leq$ l $\leq$ 11  |
| restraints / parameters          | 6/1153                 | 4/595                  |
| CCDC number                      | 2350554                | 2350558                |

**Table S4.** Typical organic room temperature phosphorescent materials with single bond rotation doped polymer.

|   | <b>Molecule</b>                                                                     | <b>Polymer</b> | $\tau_p$ | <b>Cite</b>                   |
|---|-------------------------------------------------------------------------------------|----------------|----------|-------------------------------|
| 1 | 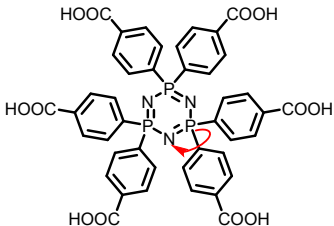 | PVA            | 0.71 s   | Sci. Adv., 2018, 4, eaas9732. |

|   |                                                                                     |      |        |                                                     |
|---|-------------------------------------------------------------------------------------|------|--------|-----------------------------------------------------|
| 2 | 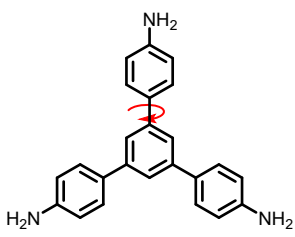   | PVA  | 1.74 s | Mater. Horiz.,<br>2022, 9, 1081.                    |
| 3 |    | PVA  | 2.43 s | Sci. Adv., 2022, 8,<br>eabl8392.                    |
| 4 |    | PVA  | 2.43 s | Nat. Commun.,<br>2022, 13, 347.                     |
| 5 |   | PMMA | 0.03 s | Angew. Chem.<br>Int. Ed., 2019,<br>131, 14278.      |
| 6 |  | PMMA | 0.52 s | Chem. Eng. J.,<br>2022, 447,<br>137458.             |
| 7 |  | PMMA | 1.51 s | ACS Appl. Mater.<br>Interfaces, 2021,<br>13, 41131. |
| 8 |  | PMMA | 1.26 s | Adv. Mater. 2022,<br>34, 2204415.                   |

|    |                                                                                   |      |        |                                          |
|----|-----------------------------------------------------------------------------------|------|--------|------------------------------------------|
| 9  | 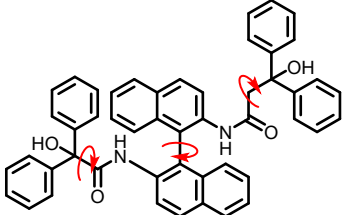 | PAN  | 1.36 s | Chem. Sci. 2024,<br>15, 8052–8061.       |
| 10 |  | CA   | 0.80 s | Adv.Funct.<br>Mater.2024,34,23<br>10198. |
| 11 |  | PMMA | 2.66 s | <b>This work</b>                         |

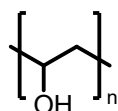

**PVA**

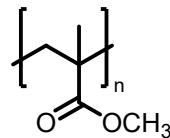

**PMMA**

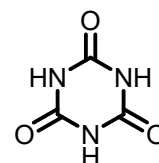

**CA**
